# Supplementary material for: Assessment of Insomnia Symptoms, Quality of Life, Daytime Sleepiness, and Psychoactive Substance Use among Polish Students: A Cross-Sectional Online Survey for Years 2016–2021 before and during COVID-19 Pandemic
Source: J Clin Med. 2022 Apr 9;11(8):2106. doi: 10.3390/jcm11082106 (PMC9026410; doi:10.3390/jcm11082106)
Supplement: Supplementary file 1 [file jcm-11-02106-s001.zip › Supplementary materials.pdf]

**Table S1.** A detailed list of the individual questions included in the Athens Insomnia Scale, divided into the period before and during the COVID-19 pandemic.

| Sleep factors                       |                                             | Whole group<br>N (%) | Before the<br>COVID-19<br>pandemic<br>N (%) | COVID-19<br>pandemic<br>N (%) | P      | Cramér's<br>V |
|-------------------------------------|---------------------------------------------|----------------------|---------------------------------------------|-------------------------------|--------|---------------|
| Sleep induction                     | No problem                                  | 3594 (24.2)          | 2111 (27.3)                                 | 1483 (20.9)                   | <0.001 | 0.078         |
|                                     | Slightly delayed                            | 4595(30.9)           | 2369 (30.6)                                 | 2226 (31.3)                   |        |               |
|                                     | Markedly delayed                            | 4762 (32.1)          | 2319 (30.0)                                 | 2443 (34.4)                   |        |               |
|                                     | Very delayed or did not sleep at all        | 1897 (12.8)          | 942 (12.1)                                  | 995 (13.4)                    |        |               |
| Awakenings during the night         | No problem                                  | 2573 (17.3)          | 1349 (17.4)                                 | 1224 (17.2)                   | 0.010  | 0.020         |
|                                     | Minor problem                               | 8279 (55.8)          | 4370 (56.4)                                 | 3909 (55.0)                   |        |               |
|                                     | Considerable problem                        | 3416 (23.0)          | 1739 (22.5)                                 | 1677 (23.6)                   |        |               |
|                                     | Serious problem or did not sleep at all     | 580 (3.9)            | 283 (3.7)                                   | 297 (4.2)                     |        |               |
| Final awakening                     | Not earlier                                 | 7084 (47.7)          | 3861 (49.9)                                 | 3223 (45.4)                   | <0.001 | 0.052         |
|                                     | A little earlier                            | 5581 (37.6)          | 2853 (36.9)                                 | 2728 (38.4)                   |        |               |
|                                     | Markedly earlier                            | 1749 (11.8)          | 831 (10.7)                                  | 918 (12.9)                    |        |               |
|                                     | Much earlier or did not sleep at all        | 434 (2.9)            | 196 (2.5)                                   | 238 (3.3)                     |        |               |
| Total sleep duration                | Sufficient                                  | 3644 (24.5)          | 1623 (21.0)                                 | 2021 (28.4)                   | <0.001 | 0.101         |
|                                     | Slightly insufficient                       | 6390 (43.1)          | 3338 (43.1)                                 | 3052 (42.9)                   |        |               |
|                                     | Markedly insufficient                       | 4278 (28.8)          | 2503 (32.3)                                 | 1775 (25.0)                   |        |               |
|                                     | Very insufficient or did not sleep at all   | 536 (3.6)            | 277 (3.6)                                   | 259 (3.6)                     |        |               |
| Sleep quality                       | Satisfactory                                | 4120 (27.7)          | 2329 (30.1)                                 | 1791 (25.1)                   | <0.001 | 0.056         |
|                                     | Slightly unsatisfactory                     | 6601 (44.5)          | 3371 (43.6)                                 | 3230 (45.5)                   |        |               |
|                                     | Markedly unsatisfactory                     | 3396 (22.9)          | 1685 (21.8)                                 | 1711 (24.1)                   |        |               |
|                                     | Very unsatisfactory or did not sleep at all | 731 (4.9)            | 356 (4.5)                                   | 375 (5.3)                     |        |               |
| Well-being during the day           | Normal                                      | 5817 (39.2)          | 3055 (39.5)                                 | 2762 (38.9)                   | 0.331  | 0.015         |
|                                     | Slightly decreased                          | 5938 (40.0)          | 3119 (40.3)                                 | 2819 (39.7)                   |        |               |
|                                     | Markedly decreased                          | 2689 (18.1)          | 1364 (17.6)                                 | 1325 (18.6)                   |        |               |
|                                     | Very decreased                              | 404 (2.7)            | 203 (2.5)                                   | 201 (2.8)                     |        |               |
| Functioning capacity during the day | Normal                                      | 6435 (43.4)          | 3405 (44.0)                                 | 3030 (42.6)                   | 0.133  | 0.019         |
|                                     | Slightly decreased                          | 6301 (42.4)          | 3275 (42.2)                                 | 3026 (42.6)                   |        |               |
|                                     | Markedly decreased                          | 1840 (12.4)          | 917 (11.9)                                  | 923 (13.0)                    |        |               |
|                                     | Very decreased                              | 272 (1.8)            | 144 (1.9)                                   | 128 (1.8)                     |        |               |
| Sleepiness during the day           | None                                        | 955 (6.4)            | 412 (5.4)                                   | 543 (7.6)                     | <0.001 | 0.061         |
|                                     | Mild                                        | 6940 (46.7)          | 3525 (45.5)                                 | 3415 (48.1)                   |        |               |
|                                     | Considerable                                | 5598 (37.7)          | 3068 (39.6)                                 | 2530 (35.6)                   |        |               |
|                                     | Intense                                     | 1355 (9.2)           | 736 (9.5)                                   | 619 (8.7)                     |        |               |

**Table S2.** A detailed list of questions included in the Epworth Sleepiness Scale, divided into the period before and during the COVID-19 pandemic.

| How likely are you to doze off or fall asleep in the following situations? |                           | Whole group<br>N (%) | Before the COVID-19 pandemic<br>N (%) | COVID-19 pandemic<br>N (%) | P      | Cramér's V |
|----------------------------------------------------------------------------|---------------------------|----------------------|---------------------------------------|----------------------------|--------|------------|
| Sitting and reading                                                        | No chance of dozing       | 5168 (34.8)          | 2520 (32.6)                           | 2648 (37.2)                | <0.001 | 0.065      |
|                                                                            | Slight chance of dozing   | 4427 (29.8)          | 2269 (29.3)                           | 2158 (30.4)                |        |            |
|                                                                            | Moderate chance of dozing | 3519 (23.7)          | 1944 (25.1)                           | 1575 (22.2)                |        |            |
|                                                                            | High chance of dozing     | 1734 (11.7)          | 1008 (13.0)                           | 726 (10.2)                 |        |            |
| Watching TV                                                                | No chance of dozing       | 4057 (27.3)          | 2023 (26.1)                           | 2034 (28.6)                | 0.001  | 0.032      |
|                                                                            | Slight chance of dozing   | 4628 (31.2)          | 2420 (31.3)                           | 2208 (31.1)                |        |            |
|                                                                            | Moderate chance of dozing | 3963 (26.7)          | 2090 (27.0)                           | 1873 (26.4)                |        |            |
|                                                                            | High chance of dozing     | 2200 (14.8)          | 1208 (15.6)                           | 992 (13.9)                 |        |            |
| Sitting inactive in a public place (e.g., a theater or a meeting)          | No chance of dozing       | 9522 (64.1)          | 4786 (61.8)                           | 4736 (66.6)                | <0.001 | 0.053      |
|                                                                            | Slight chance of dozing   | 3462 (23.3)          | 1891 (24.4)                           | 1571 (22.1)                |        |            |
|                                                                            | Moderate chance of dozing | 1387 (9.3)           | 805 (10.4)                            | 582 (8.2)                  |        |            |
|                                                                            | High chance of dozing     | 477 (3.3)            | 259 (3.4)                             | 218 (3.1)                  |        |            |
| As a passenger in a car for an hour without a break                        | No chance of dozing       | 3915 (26.4)          | 1901 (24.6)                           | 2014 (28.3)                | <0.001 | 0.057      |
|                                                                            | Slight chance of dozing   | 4246 (28.6)          | 2181 (28.2)                           | 2065 (29.1)                |        |            |
|                                                                            | Moderate chance of dozing | 3804 (25.6)          | 2016 (26.0)                           | 1788 (25.2)                |        |            |
|                                                                            | High chance of dozing     | 2883 (19.4)          | 1643 (21.2)                           | 1240 (17.4)                |        |            |
| Lying down to rest in the afternoon when circumstances permit              | No chance of dozing       | 1322 (8.9)           | 631 (8.1)                             | 691 (9.7)                  | <0.001 | 0.078      |
|                                                                            | Slight chance of dozing   | 2759 (18.6)          | 131 (16.9)                            | 1449 (20.4)                |        |            |
|                                                                            | Moderate chance of dozing | 4248 (28.6)          | 2119 (27.4)                           | 2129 (30.0)                |        |            |
|                                                                            | High chance of dozing     | 6519 (43.9)          | 3681 (47.6)                           | 2838 (29.9)                |        |            |
| Sitting and talking to someone                                             | No chance of dozing       | 13072 (88.0)         | 6804 (87.9)                           | 6268 (88.2)                | 0.355  | 0.014      |
|                                                                            | Slight chance of dozing   | 1545 (10.4)          | 825 (10.7)                            | 720 (10.2)                 |        |            |
|                                                                            | Moderate chance of dozing | 190 (1.3)            | 95 (1.2)                              | 95 (1.3)                   |        |            |
|                                                                            | High chance of dozing     | 41 (0.3)             | 17 (0.2)                              | 24 (0.3)                   |        |            |
| Sitting quietly after a lunch without alcohol                              | No chance of dozing       | 4453 (30.0)          | 2263 (29.2)                           | 2190 (30.8)                | 0.076  | 0.021      |
|                                                                            | Slight chance of dozing   | 5055 (34.0)          | 2646 (34.2)                           | 2409 (33.9)                |        |            |
|                                                                            | Moderate chance of dozing | 3592 (24.2)          | 1881 (24.3)                           | 1711 (24.1)                |        |            |
|                                                                            | High chance of dozing     | 1748 (11.8)          | 951 (12.3)                            | 797 (11.2)                 |        |            |
| In a car, while stopped for a few minutes in traffic                       | No chance of dozing       | 13991 (94.2)         | 7269 (93.9)                           | 6722 (94.6)                | 0.113  | 0.020      |
|                                                                            | Slight chance of dozing   | 715 (4.8)            | 400 (5.2)                             | 315 (4.4)                  |        |            |
|                                                                            | Moderate chance of dozing | 102 (0.7)            | 55 (0.7)                              | 47 (0.7)                   |        |            |
|                                                                            | High chance of dozing     | 40 (0.3)             | 17 (0.2)                              | 23 (0.3)                   |        |            |
